# Supplementary material
Source: MDPI journal article supplement (https://www.mdpi.com/1999-4907/14/1/27)

Figure S1. Regional precipitation trend during 2000 – 2014 and four comparative zones.

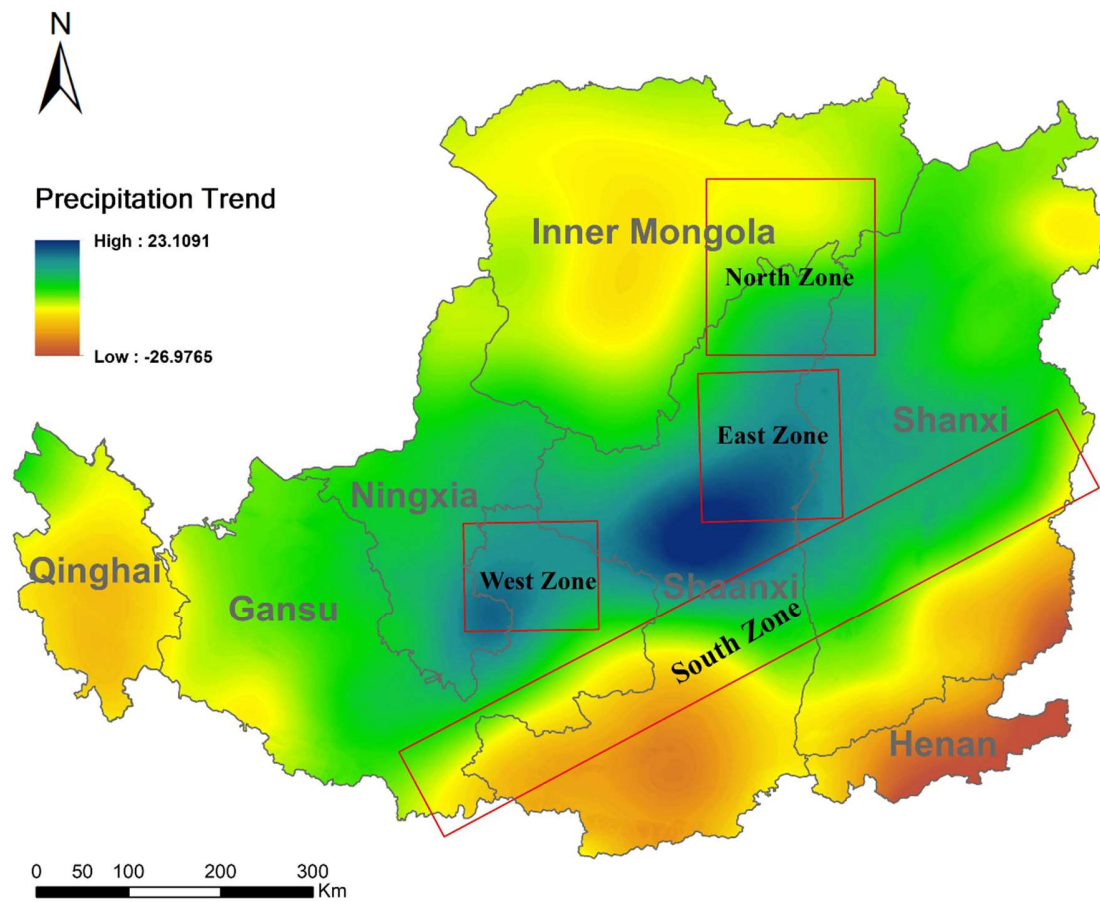

Figure S2. NPP, ET and WUE from 1982 – 1989, 1990 – 1999, 2000 – 2007 and 2008 – 2014. ET and WUE data only available after 2000.

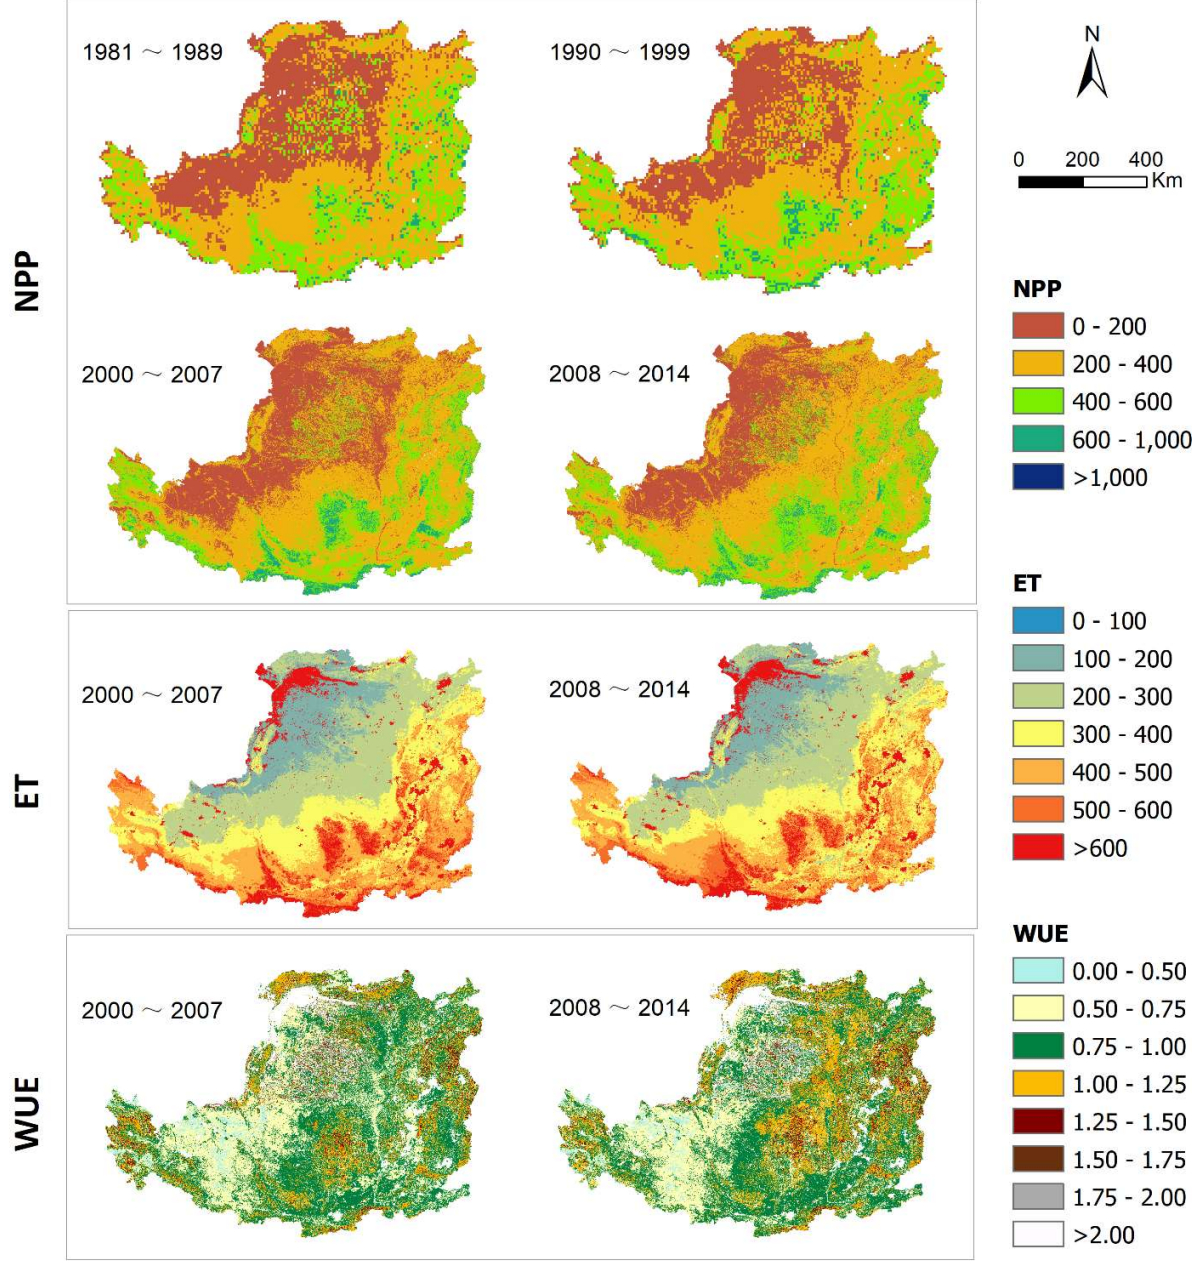

Supplement: s1 [file s1 › forests-2097081-supplementary.pdf]
